# Supplementary material
Source: PubMed Central journal article supplement (PMC3260386)
Supplement: NIHMS320648-supplement-1.pdf [file NIHMS320648-supplement-1.pdf]

**CD49f and CD61 identify Her2/neu-induced mammary tumor initiating cells that are potentially derived from luminal progenitors and maintained by the integrin-TGF $\beta$  signaling**

**Supplementary Materials and Methods**

***Cell isolation***

Lin<sup>-</sup> epithelial cells from mammary glands were isolated using the EasySep negative selection kit (StemCell Technologies, Vancouver, BC, Canada) according to the manufacturer's instructions. In brief, mammary glands were minced and incubated in digestion medium (300U/mL collagenase, 100U/mL hyaluronidase, 5% FBS, 10ng/mL EGF, 10 ng/mL FGF, 4 $\mu$ g/mL heparin in EpiCult-B basal medium) for 5h at 37°C with constant agitation. Lin<sup>-</sup> epithelial cells were enriched by removing CD45<sup>+</sup>/Ter119<sup>+</sup>, CD31<sup>+</sup> and CD140a<sup>+</sup> cells using antibodies against those respective surface antigens and the EasySep magnet. Isolated cells were kept on ice until analysis.

***Quantitative real-time RT-PCR analysis***

Total RNA isolated from H6O5 cells was reverse-transcribed using M-MLV reverse transcriptase (Invitrogen, Carlsbad, CA, USA) according to the manufacturer's instructions. We carried out quantitative real-time RT-PCR using RT<sup>2</sup> Fast SYBR<sup>®</sup> Green/ROX<sup>™</sup> qPCR Master Mix (SABiosciences, Frederick, MD, USA) and primers indicated in Supplementary Table 1. Data analysis was performed using the  $2^{-\Delta\Delta C_T}$  method for relative quantification, and all sample values were normalized to the glyceraldehyde-3-phosphate dehydrogenase (Gapdh) expression value (as the internal reference control).

***Cell Proliferation Analysis***

1 $\times$ 10<sup>4</sup> cells were plated in 24 well plates with 500 $\mu$ l complete medium. Next day old medium was replaced with fresh medium containing SB431542 or A-83-01 at the concentration as indicated and cells were further cultured. Cell proliferation assays were performed every day up to a period of 5 days. At the desired time points, 50 $\mu$ l of the 5

mg/ml MTT (3-(4,5-Dimethylthiazol-2-yl)-2,5-Diphenyltetrazolium Bromide) (Sigma, St. Louis, MO, USA) solution was added to each well. Cells were incubated at 37°C in a CO<sub>2</sub> incubator for 4 hr, and formazan crystals formed in each well during the incubation period were dissolved in 500µl of Ethanol: DMSO (1:1) mixture. 100µL of the dissolved crystals were transferred to a 96 well plate and the optical density was read on an ELISA plate reader at 595 nm against a reference wavelength of 630 nm. Growth curve was prepared by plotting OD at 595 nm (on y axis) against time (on x axis).

### ***Western blot analysis***

Protein concentration was measured using BCA kit (Thermo Scientific, Rockford, IL, USA) and protein lysates were separated by SDS-PAGE and then blotted onto Hybond-C extra membranes (GE Healthcare, Buckinghamshire, UK) for Western blot analysis. Antigen-antibody reaction was detected using Super Signal West Pico and Femto chemiluminescent substrate kits according to manufacturer's instructions (Thermo Scientific). The primary antibodies used for Western blot analysis are phosphor-FAK (Tyr397), FAK, phosphor-c-Src (Tyr416), c-Src, phospho-Smad2 (Ser465/467), Smad2, phospho-Smad3 (Ser423/425), Smad3 (Cell Signaling Technology, Beverly, MA), actin (c4/actin, Becton Dickinson) and Neu (C-18, Santa Cruz Biotechnology, Santa Cruz, CA).

### ***siRNA transfection***

siRNA transfections were performed with 20 nM of each siRNA using Oligofectamine<sup>TM</sup> RNAiMAX (Invitrogen) according to the instructions of the manufacturer. The mouse CD61 siRNA (siGENOME SMARTpool) and control siRNA were purchased from Dharmacon (Boulder, CO).

### ***Statistical analysis***

The frequency of TICs in the total cell population was calculated based on a Poisson probability distribution as described previously (Liu *et al.*, 2007). The Student's t-test was used to analyze the significance of difference between two groups of data.  $P < 0.05$  was regarded as statistically significant.

**Supplementary Table 1** Primer sequences for real-time RT-PCR analysis

| Gene Name | Forward Primer                    | Reverse Primer                |
|-----------|-----------------------------------|-------------------------------|
| Abcg2     | TTCACTTGTATATTATACTTCATGTTAGGACTG | CGATTGTCATGAGAAGTGTGGCT       |
| Aldh1     | GCTGGGGTGGTGTGGGTT                | GACCATGTTCACCCAGTTCTCTTC      |
| Bmi1      | GAGAAGCCTAAGGAAGAGGTGAATG         | CAGGTATAAATGTAGGCAATGTCCA     |
| CD133     | TTATATGGTGTTCACAATCCTGTTATGAC     | GCTTTCATGTTGACTATCTTGTGGTTC   |
| CD29      | CAAGTGGGACACGGGTGAA               | CTACTGTGACTAAGATGCTGCTGCTG    |
| CD44      | GCGGTCAATAGTAGGAGAAGGTGTG         | GCACCATTTCTGAGACTTGTGCTG      |
| CD49f     | GGCTCTATTAGTGTTTTACTGTGGAAGTG     | AATACTATGCATCGGAAGTAAGCCTCTC  |
| CD61      | GAGCCAAGTGGGACACAGCA              | CGTCATCTGAAGATGGTCTCATTAAAGT  |
| ESA       | ATGAGAAGGCTGAGATAAAGGAGATG        | AGTCCGAGCTCTTCTGCCACT         |
| Gli1      | TCCGACCCACTCCAATGAGAA             | CTCGATGCCGCTTGGTCAC           |
| Gli2      | GCTTGGACTGACACAGGAGCA             | AGTGGCAGTTGGTCTCGTAGATG       |
| Jag1      | GATGGGAACCCCTGTCAAGGA             | GAGGAACCAGGAAATCTGTTCTGT      |
| Mdr1      | TCATTTGCTCCTGACTATGCCA            | TTTACATTTCTTCTAACAGAGTAGGCTTC |
| Nanog     | GAACCTCTCCTCATTCTGAACCTGA         | TGGTGTGAGCCCTTCTGAATC         |
| Notch1    | ATGTCAATGTTTCGAGGACCAGATG         | GATGAAGTCAGAGATGACAGCAGGTG    |
| Notch2    | AACAGAGATATGCAGGACAATAAGGAAG      | GCGGTCCATGTGGTCAAGTG          |
| Notch3    | CAGTGGATGAGCTTGGGAAATCT           | ACAGCGGCGTCTTCTCCTTG          |
| Oct3/4    | CGGAAGAGAAAGCGAACTAGCA            | TACAGAACCATACTCGAACCACATC     |
| Procr     | AGACTGCCGTGTGGGTGTCA              | CGACCTGTTTGGCTCCCTTTC         |
| Sca1      | GCCCTACTGTGTGCAGAAAGAG            | CTTACTTTCCTTGTGTTGAGAATCCA    |
| Sox1      | GAAAACCCCAAGATGCACAACCTC          | GCTTCTCGGCCTCGGACA            |
| Sox2      | CTTCGCAGGGAGTTCGCA                | CAAATTCTCAGCTTATAAACAATGGACA  |
| Sox4      | GGCTGGGGACTCGAAGGA                | GGAAGCTCGTTGGAAGGGTG          |
| Stat3     | GGAAAAGGACATCAGTGGCAAGA           | GGGTAGAGGTAGACAAGTGGAGACA     |
| Tgfb2     | CAATGCTGTGGGAGAAAGTGAAG           | CTCGGTCTCTCAGCACACTGTC        |
| Tp63      | ACAGACTGCAGCATTGTCAAGTTTC         | CTTCAGACTTGCCAAATCATCCA       |
| CD24      | GCTCCTACCCACGCAGATTTACT           | CCCCTCTGGTGGTAGCGTTACTT       |
| Krt5      | TGACAACGTCAAGAAGCAGTGTG           | TCCTGGTACTCCCCGAGCA           |
| Krt6      | GATCGACCACGTTAAGAAGCAGTGT         | GCATCCTCCAGCCCTTCCAG          |
| Krt14     | GAGGAATGGTTCTTCAGCAAGACA          | GGTTATTCTCCAGGGATGCTTTCA      |
| Krt18     | TGGACAAGTACTGGTCTCAGCAGATT        | CTGTTCTCCAAGTTGATGTCTGGTT     |
| Pai       | AGGTAAACGAGAGCGGCACAGT            | GCCCATGAAGAGGATTGTCTCTGTC     |
| Il6       | AAATCGTGGAAATGAGAAAAGAGTTGT       | TTTCTGATTATATCCAGTTTGGTAGCA   |
| Igfbp3    | GAAGGGGTTCTATAAGAAGAAGCAGTG       | CACGCTGAGGCAATGTACGTC         |
| Cdh2      | GCTGATCCTTGTCTCATGTTTGTG          | GCTGGCTCAAGTCATAGTCTGGT       |
| Foxc2     | GTGTCCACTGGATAAGGTTTCGTCT         | CATCTACTGTACAAAGCCATGCACCTC   |
| Sma       | CGTGAGATTGTCCGTGACATCAAG          | CCCCTGACTCCATCCCA             |
| Snail     | GCCTTGTGTCTGCACGACCTG             | TCTTACATCCGAGTGGGTTTG         |
| Twist1    | CCACGAGCGGCTCAGCTAC               | CCTTCTCTGGAAACAATGACATCTAGG   |
| Zeb1      | AGACACAAATATGAGCACACAGGTAAGA      | GCTTGCCACACTTGTACATTG         |
| Gapdh     | GTCGGTGTGAACGGATTGG               | CGTGAGTGGAGTCATACTGGAACA      |

**Supplementary Table 2** Expression profiling analysis of stem cell signature and differentiation marker genes in H6O5 cells vs. NMuMG cells

| Gene Classification                 | Full Gene Name                                             | Gene Symbol     | Expression fold (H6O5/NMuMG) |
|-------------------------------------|------------------------------------------------------------|-----------------|------------------------------|
| <b>Stem cell signature genes</b>    | ATP-binding cassette, sub-family G (WHITE), member 2       | Abcg2           | 15.267                       |
|                                     | aldehyde dehydrogenase 1 family, member A1                 | Aldh1 (Aldh1a1) | 0.001                        |
|                                     | Bmi1 polycomb ring finger oncogene                         | Bmi1            | 1.542                        |
|                                     | hematopoietic stem cell antigen (prominin-1)               | CD133 (Prom1)   | 1.576                        |
|                                     | antigen CD29 includes MDF2 (integrin, beta 1)              | CD29 (Itg1)     | 1.649                        |
|                                     | cell surface glycoprotein CD44                             | CD44            | 0.459                        |
|                                     | CD49 antigen-like family member F (integrin, alpha 6)      | CD49f (Itga6)   | 3.741                        |
|                                     | antigen CD61 (integrin, beta 3)                            | CD61 (Itgb3)    | 8.081                        |
|                                     | epithelial cell adhesion molecule                          | ESA (Epcam)     | 467.431                      |
|                                     | GLI-Kruppel family member GLI1                             | Gli1            | 1.009                        |
|                                     | GLI-Kruppel family member GLI2                             | Gli2            | 0.036                        |
|                                     | Protein jagged-1 (antigen CD339)                           | Jag1            | 0.297                        |
|                                     | ATP-binding cassette, sub-family B (MDR/TAP), member 1     | Mdr1 (Abcb1)    | 0.001                        |
|                                     | homeobox transcription factor Nanog                        | Nanog           | 39.266                       |
|                                     | transmembrane receptor Notch1                              | Notch1          | 1.652                        |
|                                     | transmembrane receptor Notch2                              | Notch2          | 0.325                        |
|                                     | transmembrane receptor Notch3                              | Notch3          | 161.781                      |
|                                     | POU domain, class 5, transcription factor 1                | Oct3/4 (Pou5f1) | 6.502                        |
|                                     | protein C receptor, endothelial                            | Procr           | 0.089                        |
|                                     | lymphocyte antigen 6 complex, locus A                      | Sca1            | 1.68                         |
|                                     | SRY (sex determining region Y)-box 1 transcription factor  | Sox1            | 0.121                        |
|                                     | SRY (sex determining region Y)-box 2 transcription factor  | Sox2            | 0.002                        |
|                                     | SRY (sex determining region Y)-box 4 transcription factor  | Sox4            | 0.897                        |
|                                     | signal transducer and activator of transcription 3         | Stat3           | 2.471                        |
|                                     | transforming growth factor, beta receptor II               | Tgfbr2          | 1.355                        |
|                                     | tumor protein p63                                          | Tp63            | 116.995                      |
| <b>Differentiation marker genes</b> | CD24 antigen (small cell lung carcinoma cluster 4 antigen) | CD24            | 0.315                        |
|                                     | cytokeratin-5                                              | Krt5            | 5.215                        |
|                                     | cytokeratin-6                                              | Krt6            | 1.147                        |
|                                     | cytokeratin-14                                             | Krt14           | 1783.921                     |
|                                     | cytokeratin-18                                             | Krt18           | 0.565                        |

## Supplementary Figures

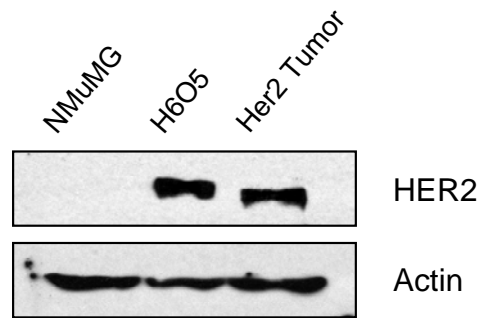

**Supplementary Figure 1** HER2 protein expression in NMuMG, H6O5 cells and primary Her2 tumor. Actin protein expression was analyzed to show equal loading of protein lysate.

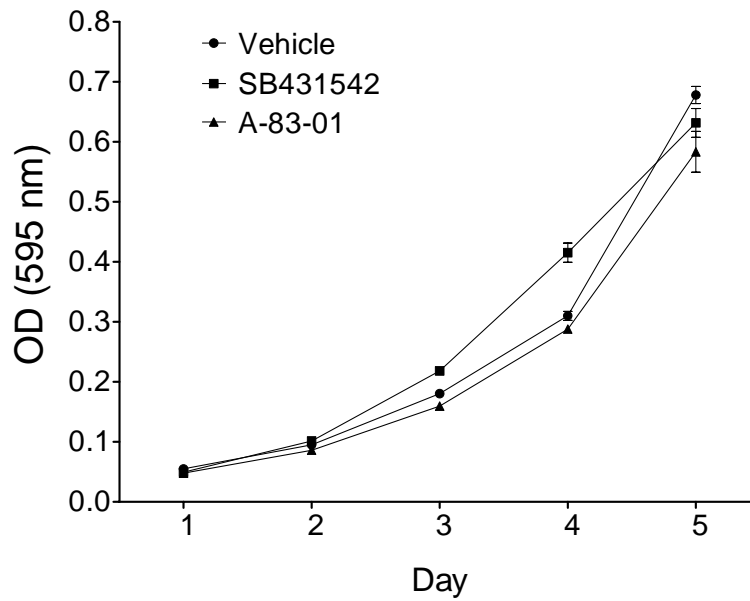

**Supplementary Figure 2** Proliferation analysis of TGFβ inhibitor-treated H6O5 cells. MTT assay was performed to measure the proliferation of H6O5 cells during five-day treatment with TGFβ inhibitors. H6O5 cells were treated with 10 μM SB431542 or with 1 μM A-83-01.

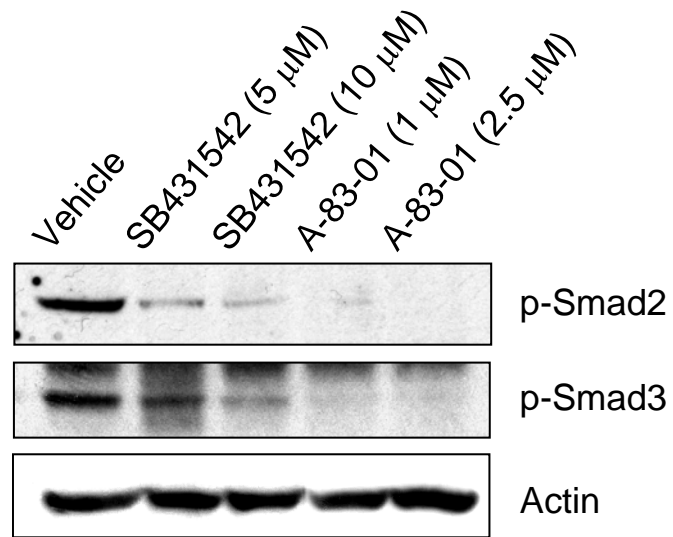

**Supplementary Figure 3** Western blot analysis of phosphorylation status of TGFβ-downstream-signaling mediators in TGFβ inhibitor-treated H6O5 cells. Phosphorylation of Smad2 (Ser465/467) and Smad3 (Ser423/425) was examined by using anti-phospho-Smad2 and anti-Smad3 antibodies. Actin protein expression was shown as a loading control.
